# Supplementary material
Source: PubMed Central journal article supplement (PMC4222523)
Supplement: NIHMS639213-supplement-Suppl_file.pdf [file NIHMS639213-supplement-Suppl_file.pdf]

## Supplementary Information

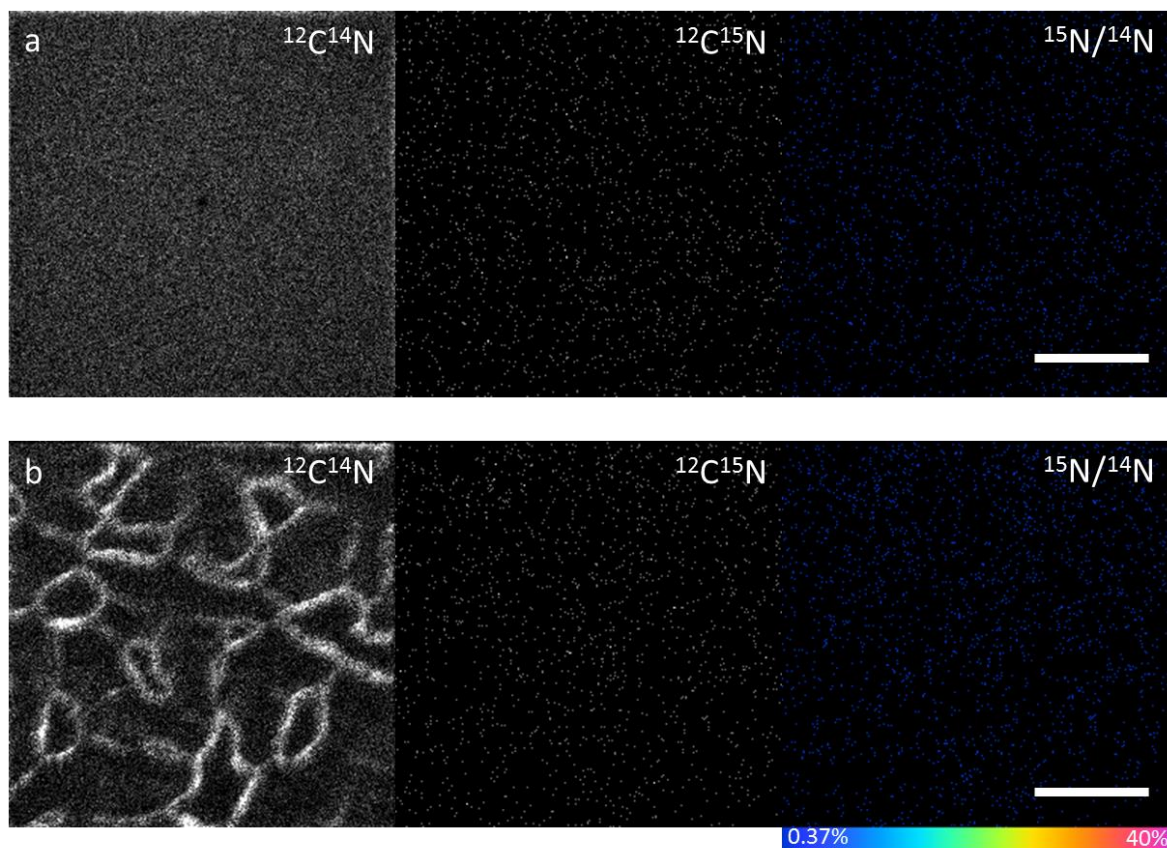

**Figure S1. NanoSIMS images of 2 control samples; bare lipid bilayers and unlabelled amhelin treated lipid bilayers.** (a)  $^{12}\text{C}^{14}\text{N}^-$ ,  $^{12}\text{C}^{15}\text{N}^-$  and  $^{15}\text{N}/^{14}\text{N}$  HSI images of a  $10\ \mu\text{m} \times 10\ \mu\text{m}$  area of bare lipid bilayers showing a featureless surface and very low signal from contamination on the surface. (b)  $^{12}\text{C}^{14}\text{N}^-$ ,  $^{12}\text{C}^{15}\text{N}^-$  and  $^{15}\text{N}/^{14}\text{N}$  HSI images of a  $10\ \mu\text{m} \times 10\ \mu\text{m}$  area of unlabelled amhelin treated lipid bilayers showing pore-like features and low  $^{12}\text{C}^{15}\text{N}^-$  signals. Both  $^{15}\text{N}/^{14}\text{N}$  HSI images show a natural abundance of the  $^{15}\text{N}$ , 0.37%. Scale of  $^{12}\text{C}^{15}\text{N}^-$  images: 0 – 1. Scale bar:  $3\ \mu\text{m}$ . ratio image: 0.37% – 40%.

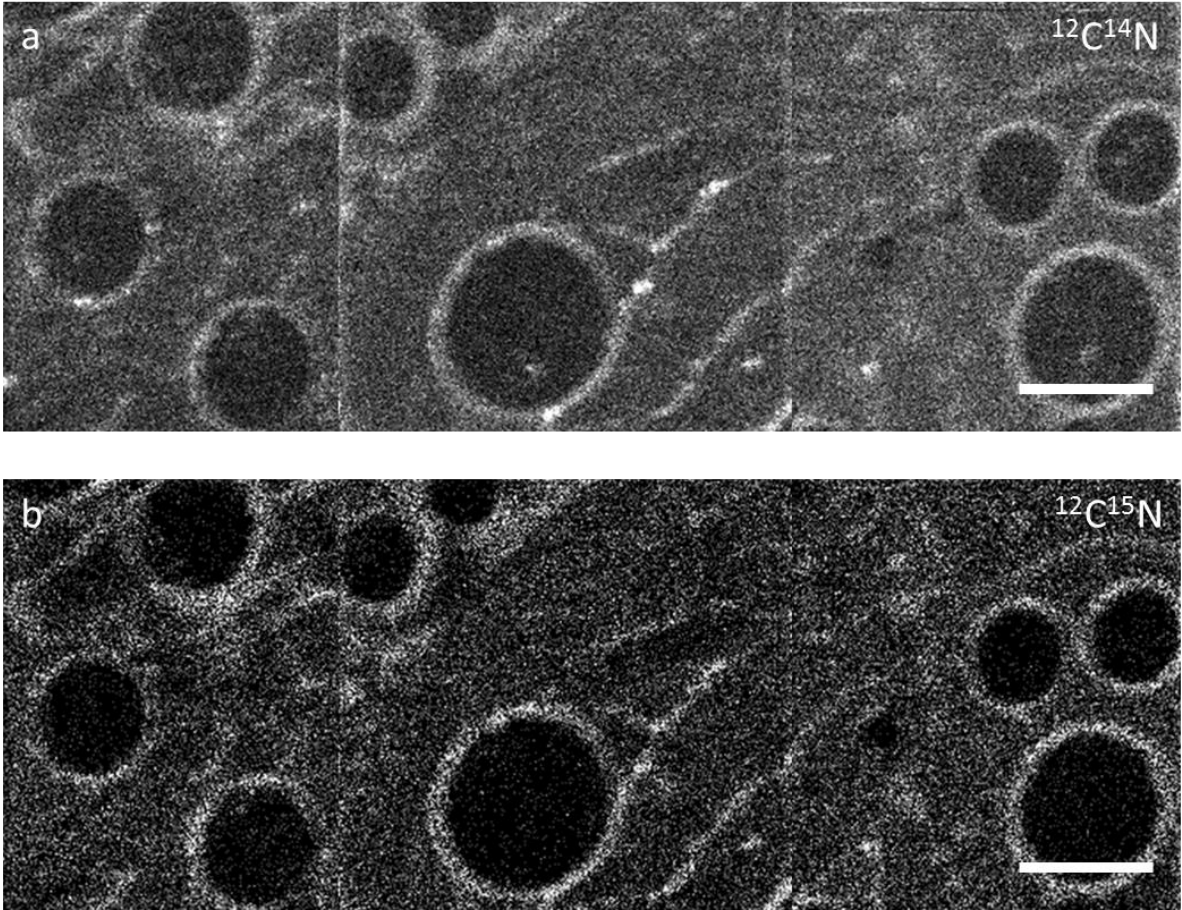

**Figure S2. NanoSIMS images of  $^{15}\text{N}$ -amphelin treated lipid bilayers.** (a, b)  $^{12}\text{C}^{14}\text{N}^-$  and  $^{12}\text{C}^{15}\text{N}^-$  NanoSIMS images from the same area as Fig 2 showing high signals from the pore edges and filament-like features, and low signals inside the pores. Scale of  $^{12}\text{C}^{14}\text{N}^-$  image: 0 – 15. Scale of  $^{12}\text{C}^{15}\text{N}^-$  image: 0 – 3. Scale bar: 3  $\mu\text{m}$ .

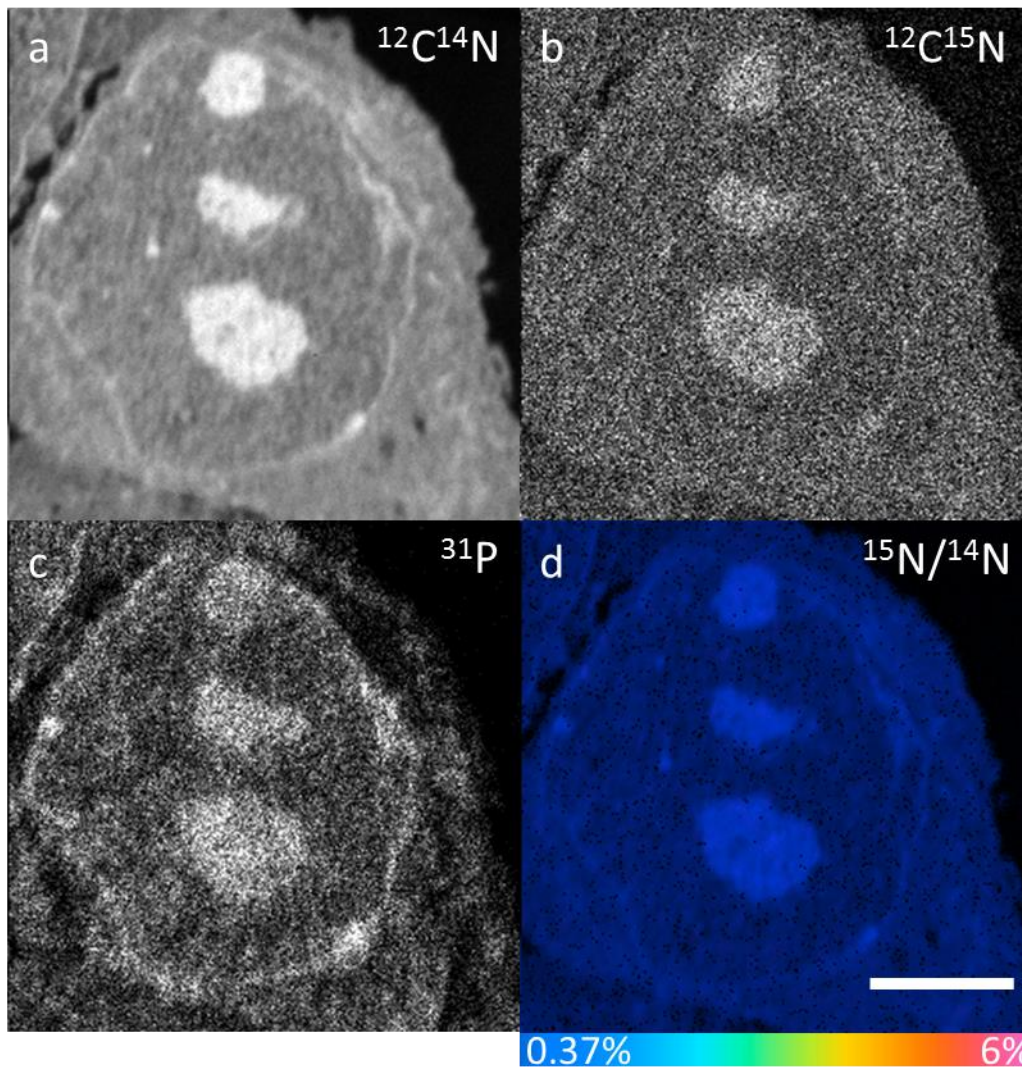

**Figure S3. NanoSIMS images on a control MCF7 cell.** (a, b, c, d)  $^{12}\text{C}^{14}\text{N}^-$ ,  $^{12}\text{C}^{15}\text{N}^-$ ,  $^{31}\text{P}^-$  and  $^{15}\text{N}/^{14}\text{N}$  HSI images of a cell cultured without isotope labelling. The nucleoli, nucleus membrane and cytoplasm are shown in the images.  $^{15}\text{N}/^{14}\text{N}$  ratio image shows the colour characteristic of the natural background concentration of  $^{15}\text{N}$ . Scale bar: 4  $\mu\text{m}$ . Colour scale of  $^{15}\text{N}/^{14}\text{N}$  image: 0.37% – 6%.

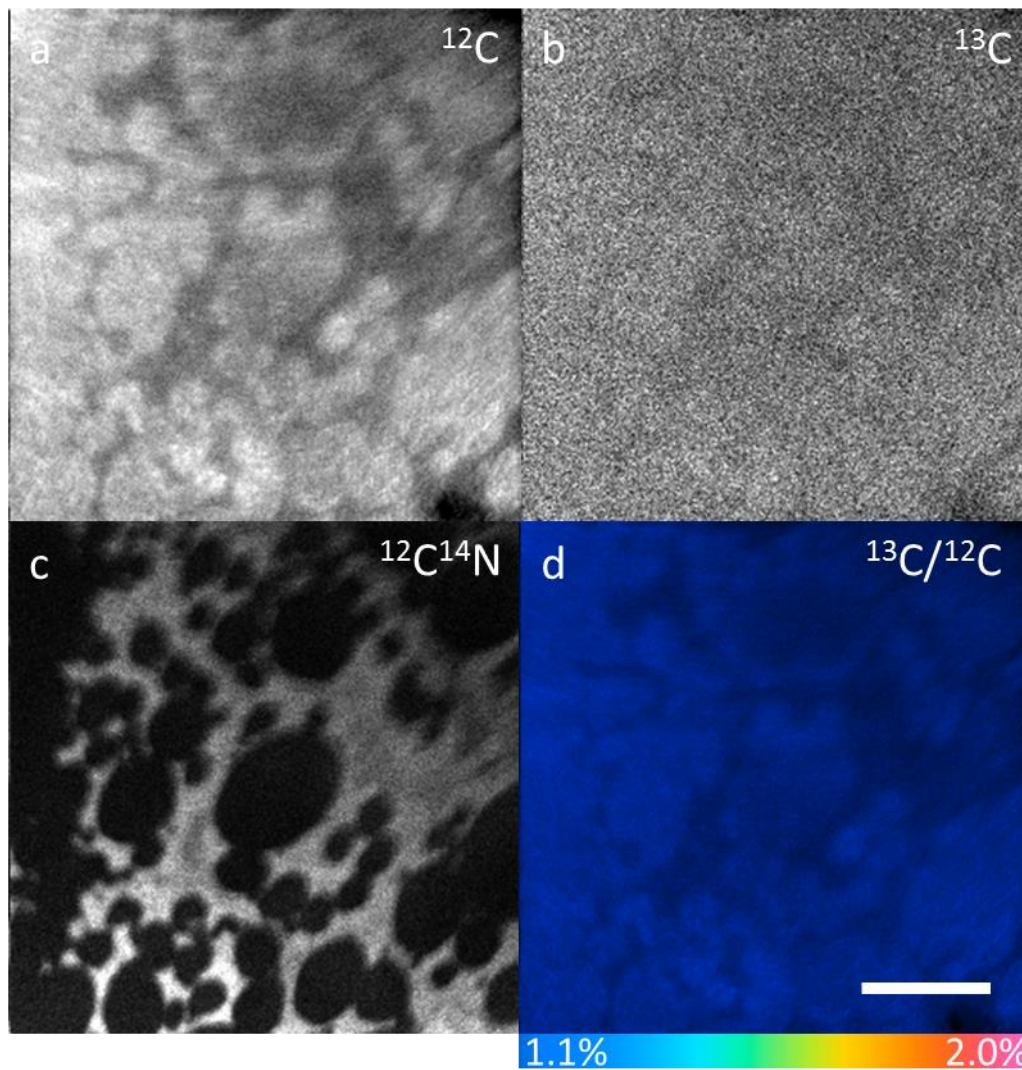

**Figure S4. NanoSIMS images on control BAT sample.** (a, b, c, d) Low-magnification  $^{12}\text{C}^-$ ,  $^{13}\text{C}^-$ ,  $^{12}\text{C}^{14}\text{N}^-$  and  $^{13}\text{C}/^{12}\text{C}$  HSI images of a  $40\ \mu\text{m} \times 40\ \mu\text{m}$  area of brown adipose tissue from a wild-type mouse after 4 days of feeding with a diet containing no extra  $^{13}\text{C}$ . The  $^{13}\text{C}/^{12}\text{C}$  HSI image shows the natural abundance of  $^{13}\text{C}$  over the whole area (1.1%). Scale bar:  $10\ \mu\text{m}$ . Colour scale of  $^{13}\text{C}/^{12}\text{C}$  ratio images: 1.1% – 2.0%.

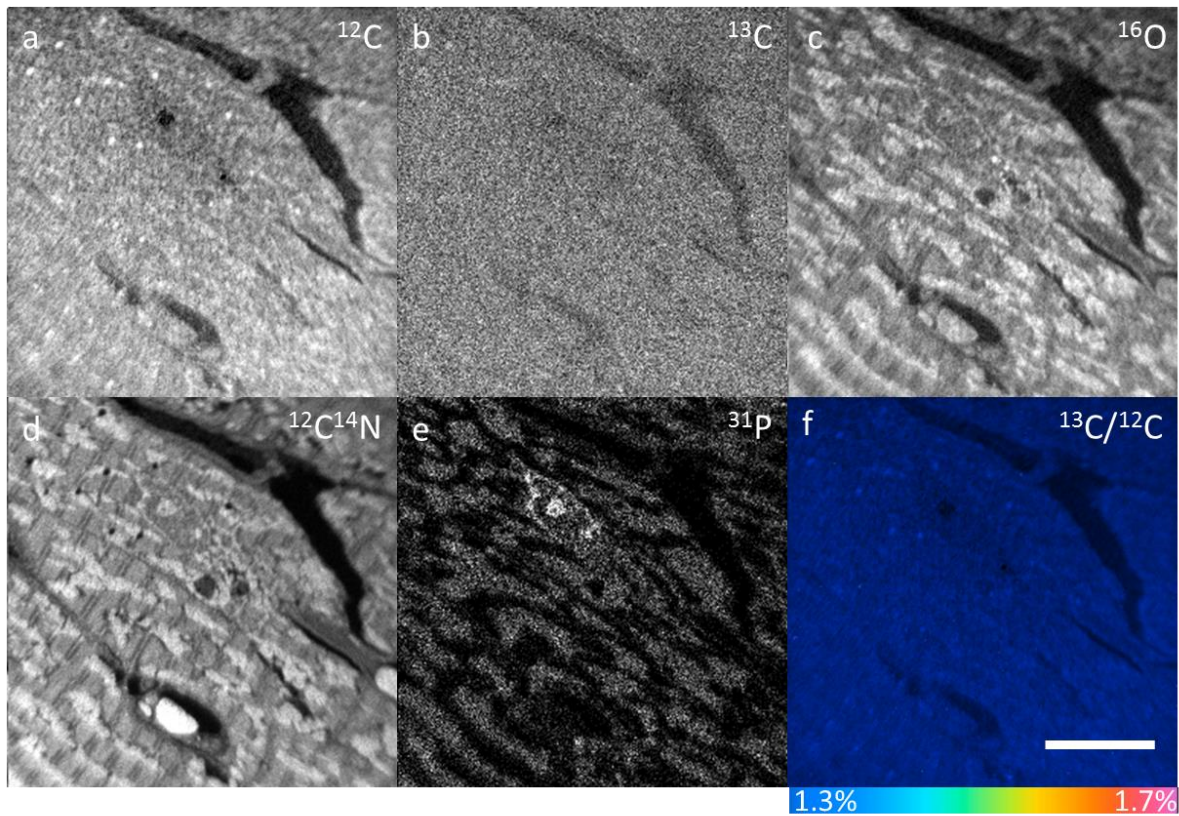

**Figure S5. NanoSIMS images on control mouse heart sample.** (a, b, c, d, e, f) Low-magnification  $^{12}\text{C}^-$ ,  $^{13}\text{C}^-$ ,  $^{16}\text{O}^-$ ,  $^{12}\text{C}^{14}\text{N}^-$ ,  $^{31}\text{P}^-$  and  $^{13}\text{C}/^{12}\text{C}$  HSI images of a  $35\ \mu\text{m} \times 35\ \mu\text{m}$  area of heart tissue from a wild-type mouse after 4 days of feeding with a diet containing no extra  $^{13}\text{C}$ . The  $^{13}\text{C}/^{12}\text{C}$  HSI image shows the natural abundance of  $^{13}\text{C}$  over the whole area (1.1%). Scale bar:  $10\ \mu\text{m}$ . Colour scale of  $^{13}\text{C}/^{12}\text{C}$  ratio images: 1.3% – 1.7%.
